# Supplementary material
Source: MDPI journal article supplement (https://www.mdpi.com/2073-445X/12/12/2097)
Supplement: s1 [file s1]

### **Supplementary Materials S1. code for images collection and adding NDVI band on GEE**

```
function get_collection(start_date, end_date) {  
  var collection = ee.ImageCollection("COPERNICUS/S2_SR_HARMONIZED")  
    .filterDate(start_date, end_date)  
    .filterBounds(studyarea)  
    .filter(ee.Filter.lt('CLOUDY_PIXEL_PERCENTAGE', cloud_threshold))  
    .map(s2mask())  
    .map(function (image) {  
      return image.divide(10000).copyProperties(image,['system:time_start']);  
    });  
  return collection.map(function(image) {  
    var ndwi = image.normalizedDifference(['B4', 'B8']).rename('NDVI');  
    image = image.addBands(ndwi.toFloat());  
    return image.toFloat().copyProperties(image,['system:time_start']);  
  })  
}
```

### **Supplementary Materials S2. code for images collection and adding NDWI band on GEE**

```
function get_collection(start_date, end_date) {  
  var collection = ee.ImageCollection("COPERNICUS/S2_SR_HARMONIZED")  
    .filterDate(start_date, end_date)  
    .filterBounds(studyarea)  
    .filter(ee.Filter.lt('CLOUDY_PIXEL_PERCENTAGE', cloud_threshold))  
    .map(s2mask())  
    .map(function (image) {  
      return image.divide(10000).copyProperties(image,['system:time_start']);  
    });  
  return collection.map(function(image) {  
    var ndwi = image.normalizedDifference(['B3', 'B8']).rename('NDWI');  
    image = image.addBands(ndwi.toFloat());  
    return image.toFloat().copyProperties(image,['system:time_start']);  
  })  
}
```
